# Supplementary material for: <em>Pythium banihashemianum </em>sp. nov. and <em>Globisporangium izadpanahii </em>sp. nov. Two New Oomycete Species from Rice Paddies in Iran
Source: Preprints.org preprint supplement (doi:10.20944/preprints202403.1451.v1), 2024-03-25
Supplement: Supplementary file 1 [file supplementary]

**Table S1.** List of primers used in this study with their PCR conditions.

| **Target DNA** | **Primer name** | **Primer sequence (5ʹ→3ʹ)** | **Reference** | **Initial denaturation** | **Number of cycles** | **Denaturation** | **Annealing** | **Extension** | **Final extension** |
| --- | --- | --- | --- | --- | --- | --- | --- | --- | --- |
| ITSa | ITS1-o | CGGAGGATCATTACCAC | Bachofer 2004 | 96 (600)e | 30 | 96 (30) | 55 (30) | 72 (60) | 72 (600) |
| LR0 | GCTTAAGTTCAGCGGGT | Moncalvo *et al.* 1995 |
|  | DC6 | GAGGGACTTTTGGGTAATCA | de Cock 1986 |
| *Btub*b | BT5 | GTATCATGTGCACGTACTCGG | Villa *et al.* 2006 | 96 (600) | 30 | 96 (20) | 48 (40 s) | 72 (120) | 72 (600) |
| BT6 | CAAGAAAGCCTTACGACGGA |
| *cox*1c | Oomcox1_Levup | GCT TAA GTT CAG CGG GT | Robideau *et al.* 2011 | 96 (600) | 30 | 96 (30) | 51 (40) | 72 (60) | 72 (600) |
| Oomcox1_Levlo | CYT CHG GRT GWC CRA AAA ACC AAA |
| *cox*2d | Cox2-F | GGCAAATGGGTTTTCAAGATCC | Hudspeth *et al.* 2000 | 96 (600) | 30 | 96 (30) | 56 (30) | 72 (60) | 72 (600) |
| Cox2-R | CCATGATTAATACCACAAATTTCACTAC |

aInternal transcribed spacers 1, 2 and 5.8S gene of rDNA. b β-tubulin. c cytochrome c oxidase subunit II. d cytochrome c oxidase subunit I. e Temperature ‘ºC’ (time s’).

**Table S2.** *Globisporangium* spp. isolate codes and GeneBank accession numbers for phylogenetic analysis comparison.

| **Species** | **Isolate Code** | **GenBank Accession No.** | | | |
| --- | --- | --- | --- | --- | --- |
| **ITS** | ***Btub*** | ***cox*1** | ***cox*2** |
| *G. abappressorium* | CBS 110198 | HQ643408.1 | KJ595533.1 | HQ708455.1 | KJ595409.1 |
| *G. acanthophoron* | CBS 337.29 | AY598711.1 | KJ595500.1 | HQ708460.1 | KJ595376.1 |
| *G. acrogynum* | CBS 549.88 | AY598638.1 | KJ595458.1 | HQ708461.1 | AB362324.1 |
| *E. anandrum* | CBS 285.31 | AY598650.1 | KJ595450.1 | HQ708483.1 | AB362328.1 |
| *G. attrantheridium* | DAOM 230386 | HQ643476.1 | AB512822.1 | HQ708523.1 | AB512889.1 |
| *G. buismaniae* | CBS 288.31 | AY598659.1 | KJ595493.1 | HQ708526.1 | KJ595368.1 |
| *G. canariense* | CBS 112353 | HQ643482.1 | JX397969.1 | HQ708528.1 | JX397983.1 |
| *G. carolinianum* | CBS 122659 | HQ643484.1 | KJ595551.1 | HQ708534.1 | KJ595427.1 |
| *G. cederbergense* | CBS 133716 | JQ412768.1 | JQ412781.1 | JQ412797.1 | JQ412805.1 |
| *G. cryptoirregulare* | CBS 118731 | HQ643515.1 | GU071888.1 | HQ708561.1 | GU071763.1 |
| *G. cylindrosporum* | CBS 218.94 | AY598643.1 | GU071877.1 | HQ708562.1 | GU071762.1 |
| *G. cystogenes* | CBS 675.85 | HQ643518.1 | KJ595520.1 | HQ708564.1 | KJ595396.1 |
| *G. debaryanum* | CBS 752.96 | AY598704.1 | KJ595523.1 | HQ708565.1 | KJ595399.1 |
| *G. echinulatum* | CBS 281.64 | AY598639.1 | KJ595449.1 | HQ708577.1 | AB362327.1 |
| *G. emineosum* | CBS 124057 | GQ244427.1 | KJ595557.1 | GQ244424.1 | KJ595432.1 |
| *G. erinaceum* | CBS 505.80 | AY598694.1 | KJ595456.1 | HQ708578.1 | AB362326.1 |
| *G. glomeratum* | CBS 122644 | HQ643542.1 | KJ595548.1 | HQ708588.1 | KJ595424.1 |
| *G. heterothallicum* | CBS 450.67 | AY598654.1 | AB512850.1 | HQ708596.1 | AB512919.1 |
| *G. hypogynum* | CBS 234.94 | AY598693.1 | KJ595447.1 | HQ708609.1 | AB362325.1 |
| *G. intermedium* | CBS 266.38 | AY598647.1 | AB512836.1 | HQ708616.1 | AB507410.1 |
| *G. irregulare* | CBS 250.28 | AY598702.1 | GU071886.1 | HQ708640.1 | GU071760.1 |
| *G. iwayamae* | CBS 156.64 | AY598648.1 | JX397965.1 | HQ708713.1 | JX397979.1 |
| *G. kandovanense* | CBS 139565 | KP723168.1 | - | KP938425.1 | - |
| *G. kunmingense* | CBS 550.88 | AY598700.1 | KJ595513.1 | HQ708716.1 | KJ595389.1 |
| *G. longisporangium* | CBS 122646 | HQ643680.1 | KJ595550.1 | HQ708724.1 | KJ595426.1 |
| *G. lucens* | CBS 113342 | HQ643681.1 | KJ595540.1 | HQ708725.1 | KJ595415.1 |
| *G. mamillatum* | CBS 251.28 | AY598703.1 | AB512844.1 | HQ708731.1 | AB512918.1 |
| *G. mastophorum* | CBS 375.72 | AY598661.1 | KJ595502.1 | HQ708735.1 | KJ595378.1 |
| *G. megalacanthum* | DAOM229154 | HQ643693.1 | - | HQ708737.1 | KJ595435.1 |
| *G. middletonii* | CBS 528.74 | AY598640.1 | KJ595457.1 | HQ708738.1 | AB362318.1 |
| *G. minor* | CBS 226.88 | HQ643696.1 | KJ595446.1 | HQ708739.1 | AB362320.1 |
| *G. multisporum* | CBS 4570.50 | AY598641.1 | KJ595455.1 | HQ708744.1 | AB362319.1 |
| *G. nagaii* | CBS 779.96 | AY598705.1 | JX397970.1 | HQ708749.1 | KJ595402.1 |
| *G. nodosum* | CBS 102274 | HQ643709.1 | KJ595531.1 | HQ708752.1 | KJ595407.1 |
| *G. nunn* | CBS 808.96 | HQ643711.1 | - | HQ708755.1 | - |
| *G. okanoganense* | CBS 315.81 | AY598649.1 | KJ595498.1 | HQ708758.1 | KJ595373.1 |
| *G. ornacarpum* | CBS 112350 | HQ643721.1 | KJ595535.1 | HQ708762.1 | KJ595411.1 |
| *G. orthogonon* | CBS 376.72 | AY598710.1 | KJ595503.1 | HQ708764.1 | KJ595379.1 |

**Table S2.** Continued.

| **Species** | **Isolate Code** | **GenBank Accession No.** | | | |
| --- | --- | --- | --- | --- | --- |
| **ITS** | ***Btub*** | ***cox*1** | ***cox*2** |
| *G. oryzicola* | UZ382 | AB468808.1 | - | LC169745.1 | AB468930.1 |
| *G. paddicum* | CBS 698.83 | AY598707.1 | JX397968.1 | HQ708769.1 | JX397982.1 |
| *G. paroecandrum* | CBS 157.64 | AY598644.1 | GU071882.1 | HQ708772.1 | DQ071391.1 |
| *G. parvum* | CBS 225.88 | AY598697.1 | KJ595445.1 | HQ708779.1 | AB362322.1 |
| *G. perplexum* | CBS 674.85 | AY598658.1 | KJ595519.1 | HQ708785.1 | KJ595395.1 |
| *G. pleroticum* | CBS 776.61 | AY598642.1 | KJ595461.1 | HQ708789.1 | AB362321.1 |
| *G. polare* | CBS 118203 | AB299390.1 | KJ595542.1 | - | KJ595417.1 |
| *G. polymastum* | CBS 811.70 | AY598660.1 | KJ595527.1 | HQ708793.1 | KJ595403.1 |
| *G. radiosum* | CBS 21794 | HQ643756.1 | MK752967.1 | HQ708797.1 | KJ595356.1 |
| *G. rhizosaccharum* | CBS 112356 | HQ643760.1 | KJ595463.1 | HQ708800.1 | AB362323.1 |
| *G. rostratifingens* | CBS 115464 | HQ643761.1 | KJ595541.1 | HQ708803.1 | KJ595416.1 |
| *G. rostratum* | CBS 533.74 | AY598696.1 | KJ595512.1 | HQ708808.1 | KJ595388.1 |
| *G. segnitium* | CBS 112354 | HQ643772.1 | KJ595537.1 | HQ708813.1 | KJ595412.1 |
| *G. selbyi* | CBS 129728 | JF836871.1 | KJ595471.1 | - | JF895532.1 |
| *G.* sp*. "jasmonicum"* | CBS 101876 | HQ643778.1 | KJ595530.1 | HQ708819.1 | KJ595406.1 |
| *G.* sp*. rooibos2* | STE-U 7550 | JQ412777.1 | JQ412789.1 | JQ412801.1 | JQ412813.1 |
| *G. spiculum* | CBS 122645 | HQ643790.1 | KJ595549.1 | HQ708831.1 | KJ595425.1 |
| *G. spinosum* | CBS 27667 | HQ643793.1 | KJ595491.1 | HQ708833.1 | KJ595366.1 |
| *G. solare* | CBS 119359 | EF688275.1 | KJ595546.1 | - | KJ595421.1 |
| *G. splendens* | CBS 462.48 | AY598655.1 | AB512852.1 | HQ708836.1 | AB512921.1 |
| *G. sylvaticum* | CBS 453.67 | AY598645.1 | KJ595507.1 | HQ708886.1 | KJ595383.1 |
| *G. takayamanum* | CBS 122491 | HQ643854.1 | KJ595468.1 | HQ708894.1 | AB362315.1 |
| *G. terrestris* | CBS 112352 | HQ643857.1 | - | HQ708898.1 | - |
| *G. ultimum* var. *sporangiiferum* | CBS 219.65 | AY598656.1 | KJ595482.1 | HQ708920.1 | KJ595357.1 |
| *G. ultimum* var*. ultimum* | CBS 398.51 | AY598657.1 | KJ595506.1 | HQ708906.1 | KJ595382.1 |
| *G. uncinulatum* | CBS 518.77 | AY598712.1 | KJ595509.1 | HQ708985.1 | KJ595385.1 |
| *G. viniferum* | CBS 119168 | HQ643956.1 | KJ595544.1 | HQ708997.1 | KJ595419.1 |
| *G. violae* | CBS 159.64 | AY598706.1 | JX397966.1 | HQ708999.1 | JX397980.1 |
| *G. yorkense* | C12-118 | KY990050.1 | KY985299.1 | KT692789.1 | KY985298.1 |

**Table S3.** *Pythium sensu stricto* isolate codes and GenBank accession numbers for phylogenetic analyses comparison.

| **Species** | **Isolate Code** | **GenBank Accession No.** | | | |
| --- | --- | --- | --- | --- | --- |
| **ITS** | ***Btub*** | ***cox*1** | ***cox*2** |
| *P. acanthicum* | CBS 377.34 | AY598617.1 | KJ595504.1 | HQ708458.1 | KJ595380.1 |
| *P. adhaerens* | CBS 520.74 | AY598619.1 | KJ595510.1 | HQ708462.1 | KJ595386.1 |
| *P. afertile* | LEV 2066 | HQ643416.1 | KJ595563.1 | HQ708463.1 | KJ595440.1 |
| *P. amasculinum* | CBS 552.88 | AY598671.1 | KJ595514.1 | HQ708481.1 | KJ595390.1 |
| *E. anandrum* | CBS 285.31 | AY598650.1 | KJ595450.1 | HQ708483.1 | AB362328.1 |
| *P. angustatum* | CBS 522.74 | AY598623.1 | KJ595511.1 | HQ708484.1 | KJ595387.1 |
| *P. aphanidermatum* | CBS 118.80 | AY598622.1 | KJ595472.1 | HQ708486.1 | KJ595344.1 |
| *P. apiculatum* | CBS 120945 | HQ643443.1 | KJ595547.1 | - | KJ595422.1 |
| *P. apleroticum* | CBS 772.81 | AY598631.1 | KJ595524.1 | HQ708491.1 | KJ595400.1 |
| *P. aquatile* | CBS 215.80 | AY598632.1 | KJ595481.1 | HQ708493.1 | KJ595355.1 |
| *P. aristosporum* | ATCC 11101 | AY598627.1 | DQ071297.1 | HQ708495.1 | AB095060.1 |
| *P. arrhenomanes* | 1994-15 | AY598628.1 | KJ595451.1 | HQ708519.1 | AF196587.1 |
| *P. capillosum* | CBS 222.94 | AY598635.1 | KJ595485.1 | HQ708529.1 | KJ595360.1 |
| *P. catenulatum* | CBS 842.68 | AY598675.1 | KJ595528.1 | HQ708536.1 | KJ595404.1 |
| *P.* cf. *dictyosporum* | ADC0114 | HQ643495.1 | - | HQ708541.1 | - |
| *P. chondricola* | CBS 203.85 | AY598620.1 | KJ595480.1 | HQ708543.1 | KJ595354.1 |
| *P. coloratum* | CBS 154.64 | AY598633.1 | KJ595474.1 | HQ708553.1 | KJ595346.1 |
| *P. conidiophorum* | CBS 223.88 | AY598629.1 | KJ595486.1 | HQ708559.1 | KJ595361.1 |
| *P. contiguanum* | CBS 221.94 | HQ643514.1 | KJ595483.1 | HQ708560.1 | KJ595358.1 |
| *P. deliense* | CBS 314.33 | AY598674.1 | KJ595497.1 | HQ708566.1 | KJ595372.1 |
| *P. diclinum* | CBS 664.79 | AY598690.1 | KJ595518.1 | HQ708569.1 | KJ595394.1 |
| *P. dissimile* | CBS 155.64 | AY598681.1 | KJ595475.1 | HQ708573.1 | KJ595347.1 |
| *P. dissotocum* | CBS 166.68 | AY598634.1 | KJ595479.1 | HQ708576.1 | KJ595351.1 |
| *P. flevoense* | CBS 234.72 | AY598691.1 | KJ595488.1 | HQ708583.1 | KJ595363.1 |
| *P. folliculosum* | CBS 22094 | HQ643540.1 | MK752994.1 | HQ708584.1 | - |
| *P. graminicola* | CBS 327.62 | AY598625.1 | KJ595452.1 | HQ708589.1 | AF196593.1 |
| *P. grandisporangium* | CBS 286.79 | AY598692.1 | KJ595492.1 | HQ708590.1 | KJ595367.1 |
| *P. helicandrum* | CBS 393.54 | AY598653.1 | KJ595453.1 | - | AB362329.1 |
| *P. hydnosporum* | CBS 253.60 | AY598672.1 | KJ595489.1 | HQ708608.1 | KJ595364.1 |
| *P. inflatum* | CBS 16868 | AY598626.1 | - | HQ708610.1 | KJ595352.1 |
| *P. insidiosum* | CBS 574.85 | AY598637.1 | KJ595515.1 | HQ708613.1 | KJ595391.1 |
| *P. kashmirense* | CBS 122908 | HQ643671.1 | KJ595553.1 | HQ708715.1 | KJ595429.1 |
| *P. lutarium* | CBS 222.88 | HQ643682.1 | KJ595484.1 | HQ708726.1 | KJ595359.1 |
| *P. lycopersicum* | CBS 122909 | HQ643683.1 | KJ595554.1 | HQ708727.1 | KJ595343.1 |
| *P. macrosporum* | CBS 574.80 | AY598646.1 | AB512842.1 | HQ708730.1 | AB512916.1 |
| *P. marinum* | CBS 750.96 | AY598689.1 | KJ595522.1 | - | KJ595398.1 |
| *P. marsipium* | CBS 773.81 | AY598699.1 | KJ595525.1 | HQ708734.1 | KJ595401.1 |
| *P. monospermum* | CBS 158.73 | HQ643697.1 | KJ595478.1 | HQ708743.1 | KJ595350.1 |

**Table S3.** Continued.

| **Species** | **Isolate Code** | **GenBank Accession No.** | | | |
| --- | --- | --- | --- | --- | --- |
| **ITS** | ***Btub*** | ***cox*1** | ***cox*2** |
| *P. myriotylum* | CBS 254.70 | AY598678.1 | KJ595490.1 | HQ708748.1 | KJ595365.1 |
| *P. oligandrum* | CBS 382.34 | AY598618.1 | KJ595505.1 | HQ708760.1 | KJ595381.1 |
| *P. oopapillum* | CBS 124053 | FJ655174.1 | KJ595556.1 | FJ655180.1 | KJ595431.1 |
| *P. ornamentatum* | CBS 122665 | HQ643722.1 | KJ595552.1 | HQ708763.1 | KJ595428.1 |
| *P. pachycaule* | CBS 227.88 | AY598687.1 | KJ595487.1 | HQ708767.1 | KJ595362.1 |
| *P. pectinolyticum* | CBS 122643 | HQ643739.1 | KJ595469.1 | HQ708780.1 | - |
| *P. periplocum* | CBS 289.31 | AY598670.1 | KJ595494.1 | HQ708782.1 | KJ595369.1 |
| *P. periilum* | CBS 16968 | AY598683.1 | KJ595444.1 | HQ708781.1 | - |
| *P. phragmitis* | CBS 117104 | HQ643746.1 | EU152854.1 | HQ708787.1 | AJ890351.1 |
| *P. plurisporium* | CBS 100530 | AY598684.1 | KJ595529.1 | HQ708790.1 | KJ595405.1 |
| *P. porphyrae* | CBS 369.79 | AY598673.1 | KJ595501.1 | HQ708794.1 | KJ595377.1 |
| *P. prolatum* | CBS 845.68 | AY598652.1 | KJ595462.1 | - | AB362330.1 |
| *P. pyrilobum* | CBS 158.64 | AY598636.1 | KJ595477.1 | HQ708796.1 | KJ595349.1 |
| *P. recalcitrans* | CBS 122440 | DQ357833.1 | EF195143.1 | - | KJ595423.1 |
| *P. rhizo-oryzae* | CBS 119169 | HQ643757.1 | KJ595545.1 | HQ708798.1 | KJ595420.1 |
| *P. salpingophorum* | CBS 471.50 | AY598630.1 | KJ595508.1 | HQ708809.1 | KJ595384.1 |
| *P. schmitthenneri* | CBS 129726 | JF836869.1 | KJ595470.1 | - | JF895530.1 |
| *P. scleroteichum* | CBS 294.37 | AY598680.1 | KJ595495.1 | HQ708812.1 | KJ595370.1 |
| *P. senticosum* | CBS 122490 | HQ643773.1 | KJ595467.1 | - | AB362317.1 |
| *P.* sp. *spiculacarpum* | CBS 122647 | - | - | HQ708815.1 | - |
| *P.* sp. *tumidum* | CBS 223.94 | EF583440.1 | - | HQ708816.1 | - |
| *P. sukuiense* | CBS 110030 | HQ643836.1 | KJ595532.1 | HQ708877.1 | KJ595408.1 |
| *P. sulcatum* | CBS 603.73 | AY598682.1 | KJ595517.1 | HQ708878.1 | KJ595393.1 |
| *P. tardicrescens* | LEV 1534 | HQ643855.1 | KJ595562.1 | HQ708896.1 | KJ595439.1 |
| *P. torulosum* | CBS 316.33 | AY598624.1 | KJ595499.1 | HQ708900.1 | KJ595374.1 |
| *P. tracheiphilum* | CBS 32365 | HQ643862.1 | - | HQ708903.1 | KJ595375.1 |
| *P. vanterpoolii* | CBS 295.37 | AY598685.1 | KJ595496.1 | HQ708991.1 | KJ595371.1 |
| *P. volutum* | CBS 699.83 | AY598686.1 | KJ595521.1 | HQ709012.1 | KJ595397.1 |
| *P. zingiberis* | CBS 21782 | HQ643972.1 | - | HQ709013.1 | - |

**Table S4.** Base pair differences across *Btub*,ITS, *cox*1,and *cox*2sequences showing the inter- and intraspecific variation of *Globisporangium izadpanahii* (IZA) and other related species, including *G. coniferarum* (CON), *G. nagaii* (NAG), *G. violae* (VIO), *G. okanoganense* (OKA), *G. canariense* (CAN), *G. monoclinum* (MON), and *G. iwayamae* (IWA).

| Region | Alignment length  (bp) | Differences IZA/NAG  (bp) | Differences IZA/CON (bp) | Differences IZA/VIO (bp) | Differences IZA/OKA  (bp) | Differences IZA/IWA  (bp) | Differences IZA/CAN (bp) | Differences IZA/MON (bp) | Differences within IZA  (bp) |
| --- | --- | --- | --- | --- | --- | --- | --- | --- | --- |
| *Btub* | 480 | 50 | 12 | 53 | 51 | 56 | 54 | DN | 2 |
| ITS | 1317 | 67 | 52 | 96 | 89 | 99 | 101 | 41 | 2 |
| *cox*1 | 393 | 20 | 8 | 26 | 32 | 26 | 27 | 20 | 0 |
| *cox*2 | 484 | 15 | 8 | 21 | 19 | 30 | 35 | DN* | 0 |
| Total | 2709 | 152 | 80 | 196 | 191 | 211 | 217 | 61 | 0-4 |

*Data not available

**Table S5.** Base pair differences across *Btub*,ITS, *cox*1,and *cox*2sequences showing the inter- and intraspecific variation of *Pythium banihashemianum* (BAN) and other related species, including *P. plurisporium* (PLU), *P. afertile* (AFE) and *P. kashmirense* (KAS).

| Region | Alignment length  (bp) | Differences BAN/PLU  (bp) | Differences BAN/AFE (bp) | Differences BAN/KAS  (bp) | Differences within BAN  (bp) |
| --- | --- | --- | --- | --- | --- |
| *Btub* | 459 | 7 | 30 | 29 | 0 |
| ITS | 877 | 9 | 21 | 21 | 0 |
| *cox*1 | 393 | 6 | 15 | 17 | 0 |
| *cox*2 | 488 | 17 | 16 | 19 | 0 |
| Total | 2045 | 39 | 82 | 86 | 0 |

**Table S6.** Morphological comparison of the species described in this study with their related species.

| **Character** | ***G. izadpanahii*** | ***G. coniferarum*** | ***G. nagaii*** | ***P. banihashemianum* (Group1: G1, Group 2: G2)** | ***P. plurisporium*** | ***P. afertile*** | ***P. kashmirense*** |
| --- | --- | --- | --- | --- | --- | --- | --- |
| **Cardinal Temperatures (°C)** | 5;35;40 | 15; 30; 40 | 9; 28; 35 | G1:10;35;40 G2:5;30;40 | 15;35;40 | 5;25;30 | 5;25;35 |
| **Daily Growth Rate at 25 °C (mm)** | 7 | 6 | 25 | G1:10  G2:7 | 10 | 18 | 10 |
| **Colony Pattern on CMA** | Radial | Radial | No data | G1; Radial  G2: Uniform | Radial | Compact colony without aerial mycelium | Median |
| **Hyphae (µm)** | 4.3 | 3.1-7.3 | 4 | G1:3.1  G2:3.5 | 8 | 6.6 | 6 |
| **Chlamydospore** |  | (+), (sub)globose, ovoid | - | - | - | + | - |
| **Sporangium or Hyphal Swelling Production (µm)** | (+) 13.2 | (+) 16.3-17.6 | (+) | (+) Variable | (+) Variable | (+) Variable | (+) Variable |
| **Sporangium or Hyphal Swelling Shape** | Globose | Ellipsoid,  globose, ovoid, with pedicel | Ovoid, pyriform | G1: filamentous, inflated;  G2: Filamentous, slightly inflated | Filamentous, inflated | Strictly filamentous | Filamentous, slightly inflated |

**Table S6.** Continued.

| **Character** | ***G. izadpanahii*** | ***G. coniferarum*** | ***G. nagaii*** | ***P. banihashemianum* (Group1: G1, Group 2: G2)** | ***P. plurisporium*** | ***P. afertile*** | ***P. kashmirense*** |
| --- | --- | --- | --- | --- | --- | --- | --- |
| **Sporangium or Hyphal Swelling Position** | Terminal or intercalary | Mostly terminal | Terminal | - | - | - | - |
| **Sporangium Proliferation** | - | - | + | - | - | - | - |
| **Zoospore Production** | - | + | + | + | + | + | + |
| **Homothallic/Heterothallic** | Homothallic | Homothallic | Homothallic | Homothallic | Homothallic | No sexual structure | Homothallic |
| **Oogonium Ornamentation** | Smooth with a papillae | Smooth | Smooth | Smooth with 2 papilla | Smooth | No sexual structure | Smooth |
| **Oogonium Shape and**  **Dimensions (µm)** | Globose, 63 | Globose, ovoid, ellipsoid, 25.9-26.7 | Globose, sometimes irregular, 14-22 | G1: Ovoid, amorphous, 33.3;  G2: Globose, 38.3 | Globose to obpyriform, 23-35 | - | Globose, 16.7 |
| **Antheridium Shape** | Crook-naked, elongated, clavate | Clavate to no  specific shape | Clavate | G1 & G2: Clavate, crook-naked | Crook-naked | - | Clavate |
| **Antheridium Type and Number per Oogonium** | Mostly monoclinous, 1 | Monoclinous and diclinous,  paragynous, rarely  hypogynous, 1-5 | Monoclinous, 1 (disappears after fertilization) | G1: Monoclinous and diclinous, 4-8  G2: mostly monoclinous, 1-4 | Monoclinous, and Diclinous, 2-12 | - | Mostly monoclinous,1-8 |
| **Oospore Type and Dimensions (µm)** | Perfectly plerotic, 63 | Aplerotic and  plerotic  21.3-23.2 | Aplerotic,  12-19 | G1: Aplerotic, 32.5  G2: Aplerotic, 32.4 | Aplerotic,  26.2-30 | - | Aplerotic,  15.4 |
| **Oospore Wall (µm)** | 9.2 | 1.9-3.1 | 0.8 | G1: 1.7  G2:1.5 | 2.2-3 | - | 0.7 |

**Table S6.** Continued.

| **Character** | ***G. izadpanahii*** | ***G. coniferarum*** | ***G. nagaii*** | ***P. banihashemianum* (Group1: G1, Group 2: G2)** | ***P. plurisporium*** | ***P. afertile*** | ***P. kashmirense*** |
| --- | --- | --- | --- | --- | --- | --- | --- |
| **Number of Oospore per**  **Oogonium** | 1 | 1 | 1 | G1: 1-2  G2: 1 | 1-6 | - | 1 |
